# Supplementary material for: Recommendations for the safety of hospitalised patients in the context of the COVID-19 pandemic: a scoping review
Source: HighWire-hosted journal article supplement (doi:10.1136/bmjopen-2021-060182), 2022-09-01
Supplement: bmjopen-2021-060182supp002_data_supplement.pdf [file bmjopen-2021-060182supp002_data_supplement.pdf]

## Appendix B. Data Abstraction Form

The form was designed by the authors based on the JBI template source of evidence details, characteristics and results extraction instrument for scoping reviews. New sections were added and those not relevant to the study were excluded.

This form was applied to the studies included in the review, defined after step 1 (decision by title and abstract) and step 2 (reading of the full text and search in the references).

### Notes on using data extraction form:

- Pilot test of the form carried out before starting final data extraction.
- Record all information identified as missing/not reported.
- Include all information that meets the purpose and items of the form.

| 1. General Information                                                  |                                                                                                                                                                                                                                                                                                                                                                                                                                                                                                                                                                                                                                                                                                                                                                                                                                                                                                                                                                                                                                                                                                                                                                                                                                                                                                              |
|-------------------------------------------------------------------------|--------------------------------------------------------------------------------------------------------------------------------------------------------------------------------------------------------------------------------------------------------------------------------------------------------------------------------------------------------------------------------------------------------------------------------------------------------------------------------------------------------------------------------------------------------------------------------------------------------------------------------------------------------------------------------------------------------------------------------------------------------------------------------------------------------------------------------------------------------------------------------------------------------------------------------------------------------------------------------------------------------------------------------------------------------------------------------------------------------------------------------------------------------------------------------------------------------------------------------------------------------------------------------------------------------------|
| 1. Study ID number (number assigned in order of appearance in the bank) |                                                                                                                                                                                                                                                                                                                                                                                                                                                                                                                                                                                                                                                                                                                                                                                                                                                                                                                                                                                                                                                                                                                                                                                                                                                                                                              |
| 2. Name of person extracting data                                       |                                                                                                                                                                                                                                                                                                                                                                                                                                                                                                                                                                                                                                                                                                                                                                                                                                                                                                                                                                                                                                                                                                                                                                                                                                                                                                              |
| 3. Database/ Website/ Directories/ Portals                              | <input type="checkbox"/> MEDLINE<br><input type="checkbox"/> CINAHL<br><input type="checkbox"/> EMBASE<br><input type="checkbox"/> SCOPUS<br><input type="checkbox"/> SCIENCEDIRECT<br><input type="checkbox"/> IBECs<br><input type="checkbox"/> LILACS<br><input type="checkbox"/> Google Scholar<br><input type="checkbox"/> Ministry of Health (BRA)<br><input type="checkbox"/> SOBRASP – Brazilian Society for Quality of Care and Patient Safety (BRA)<br><input type="checkbox"/> ANVISA – National Health Surveillance Agency (BRA)<br><input type="checkbox"/> PROQUALIS – Collaborating Centre for the Quality of Care and Patient Safety<br><input type="checkbox"/> WHO – World Health Organization<br><input type="checkbox"/> IHI – Institute for Healthcare Improvement (USA)<br><input type="checkbox"/> ISQua – International Society for Quality in Health Care (Dublin, Ireland)<br><input type="checkbox"/> AHRQ – Agency for Healthcare Research and Quality (USA)<br><input type="checkbox"/> NICE – National Institute for Health and Care Excellence (UK)<br><input type="checkbox"/> NHS Improvement – National Health Service's (UK)<br><input type="checkbox"/> CDC - Centers for Disease Control and Prevention (USA)<br><input type="checkbox"/> Extracted from the references |

|                                                                              |                                                                                                                                                                                                                                                                                                                                                                                                                                                                                                                                                                                                                                                                                                                           |
|------------------------------------------------------------------------------|---------------------------------------------------------------------------------------------------------------------------------------------------------------------------------------------------------------------------------------------------------------------------------------------------------------------------------------------------------------------------------------------------------------------------------------------------------------------------------------------------------------------------------------------------------------------------------------------------------------------------------------------------------------------------------------------------------------------------|
| 4. Authors of the article/document                                           |                                                                                                                                                                                                                                                                                                                                                                                                                                                                                                                                                                                                                                                                                                                           |
| 5. Title of Article (that data are extracted from)                           |                                                                                                                                                                                                                                                                                                                                                                                                                                                                                                                                                                                                                                                                                                                           |
| 6. DOI/link access                                                           |                                                                                                                                                                                                                                                                                                                                                                                                                                                                                                                                                                                                                                                                                                                           |
| 7. Year                                                                      | <input type="checkbox"/> 2020<br><input type="checkbox"/> 2021<br><input type="checkbox"/> 2022                                                                                                                                                                                                                                                                                                                                                                                                                                                                                                                                                                                                                           |
| 8. Study country of origin                                                   |                                                                                                                                                                                                                                                                                                                                                                                                                                                                                                                                                                                                                                                                                                                           |
| 9. Study funding source                                                      |                                                                                                                                                                                                                                                                                                                                                                                                                                                                                                                                                                                                                                                                                                                           |
| 10. Data collection period                                                   |                                                                                                                                                                                                                                                                                                                                                                                                                                                                                                                                                                                                                                                                                                                           |
| 11. Place/institution of the study                                           |                                                                                                                                                                                                                                                                                                                                                                                                                                                                                                                                                                                                                                                                                                                           |
| 12. Aim of the study                                                         |                                                                                                                                                                                                                                                                                                                                                                                                                                                                                                                                                                                                                                                                                                                           |
| <b>2. Method</b>                                                             |                                                                                                                                                                                                                                                                                                                                                                                                                                                                                                                                                                                                                                                                                                                           |
| 13. Type of research                                                         | <input type="checkbox"/> Experimental<br><input type="checkbox"/> Exploratory<br><input type="checkbox"/> Descriptive<br><input type="checkbox"/> Exploratory-Descriptive<br><input type="checkbox"/> Case Study<br><input type="checkbox"/> Quasi-Experimental<br><input type="checkbox"/> Transversal<br><input type="checkbox"/> Longitudinal/Cohort<br><input type="checkbox"/> Case Control<br><input type="checkbox"/> Integrative Review<br><input type="checkbox"/> Narrative Review<br><input type="checkbox"/> Systematic Review<br><input type="checkbox"/> Scoping Review<br><input type="checkbox"/> Expert Opinion/ Guidelines<br><input type="checkbox"/> Other - describe                                 |
| 14. Age/age group                                                            | <input type="checkbox"/> Adult<br><input type="checkbox"/> Paediatric<br><input type="checkbox"/> Not specified                                                                                                                                                                                                                                                                                                                                                                                                                                                                                                                                                                                                           |
| 15. Sample size (Number of individuals who participated in the study/judges) |                                                                                                                                                                                                                                                                                                                                                                                                                                                                                                                                                                                                                                                                                                                           |
| 16. Data analysis                                                            |                                                                                                                                                                                                                                                                                                                                                                                                                                                                                                                                                                                                                                                                                                                           |
| <b>2. Results and findings</b>                                               |                                                                                                                                                                                                                                                                                                                                                                                                                                                                                                                                                                                                                                                                                                                           |
| 17. Hospital Sector (Sector or sectors mentioned in the studies)             | <input type="checkbox"/> Surgical Centre<br><input type="checkbox"/> Hospital Health Services<br><input type="checkbox"/> Intensive Care Unit<br><input type="checkbox"/> Endoscopy and gastroenterology centres<br><input type="checkbox"/> Gynaecology and Obstetrics<br><input type="checkbox"/> Emergency Unit<br><input type="checkbox"/> Inpatient Unit<br><input type="checkbox"/> Diagnostic Centre<br><input type="checkbox"/> Tracheal intubation<br><input type="checkbox"/> Paediatric<br><input type="checkbox"/> Field Hospitals<br><input type="checkbox"/> Oncology<br><input type="checkbox"/> Hemodynamic<br><input type="checkbox"/> Intra-hospital Transport<br><input type="checkbox"/> Orthopaedics |

|                                                                                     |                                        |
|-------------------------------------------------------------------------------------|----------------------------------------|
|                                                                                     | ( ) Psychiatry<br>( ) Other - describe |
| <b>2.1 Recommendations for Patient Safety</b>                                       |                                        |
| 18. Recommendations regarding the reorganization of health services                 |                                        |
| 18.1 Patient flow                                                                   |                                        |
| 18.2 Reorganization of the hospital environment                                     |                                        |
| 18.3 Management of human resources                                                  |                                        |
| 18.4 Management of material resources                                               |                                        |
| 18.5 Management of dead bodies                                                      |                                        |
| 19. Recommendations regarding the management of airways                             |                                        |
| 19.1 Prevention of the dissemination of aerosols                                    |                                        |
| 19.2 Approaching airways                                                            |                                        |
| 20. Recommendations regarding the sanitary and hygiene measures                     |                                        |
| 20.1 Professional and patient hygiene                                               |                                        |
| 20.2 Hygiene of the environment and equipment                                       |                                        |
| 20.3 Hygiene of the clothes of patients and professionals and hospital clothing     |                                        |
| 20.4 Waste disposal                                                                 |                                        |
| 21. Recommendations regarding the management of personal protective equipment (PPE) |                                        |
| 22. Recommendations regarding the Management of communication                       |                                        |
| <b>2.2 Conclusion and other information</b>                                         |                                        |
| 21. Key conclusions of study authors                                                |                                        |
| 22. Observation and note                                                            |                                        |
